# Supplementary material for: MUC1-C integrates type II interferon and chromatin remodeling pathways in immunosuppression of prostate cancer
Source: PubMed Central journal article supplement — Oncoimmunology. 2022 Feb 1;11(1):2029298. doi: 10.1080/2162402X.2022.2029298 (PMC8812775; doi:10.1080/2162402x.2022.2029298), 2022-02-01
Supplement: KONI_A_2029298_SM5626.pdf [file KONI_A_2029298_SM5626.pdf]

**a. LNCaP-AI/tet-MUC1shRNA**

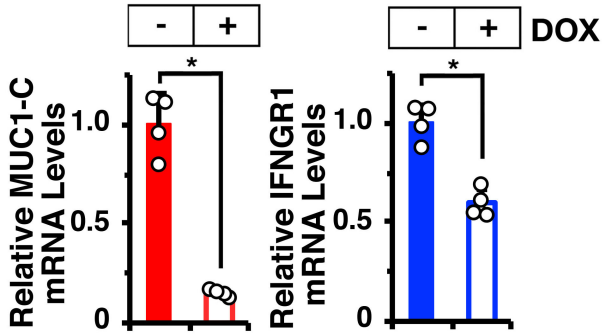

**b. LNCaP-AI/tet-MUC1shRNA**

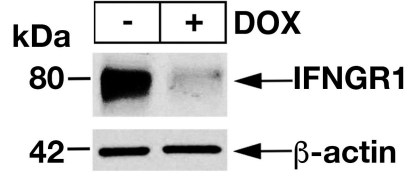

**c. PC3/tet-MUC1shRNA**

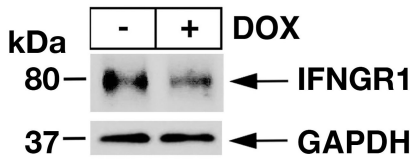

**d. H660/tet-MUC1shRNA**

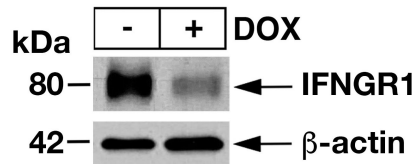

**e. DU-145**

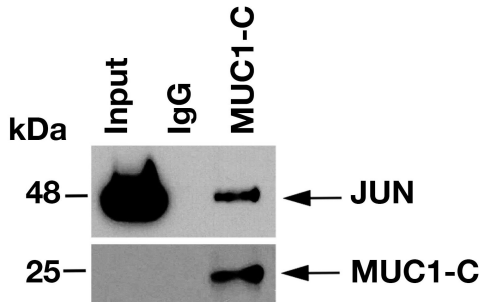

**f. DU-145**

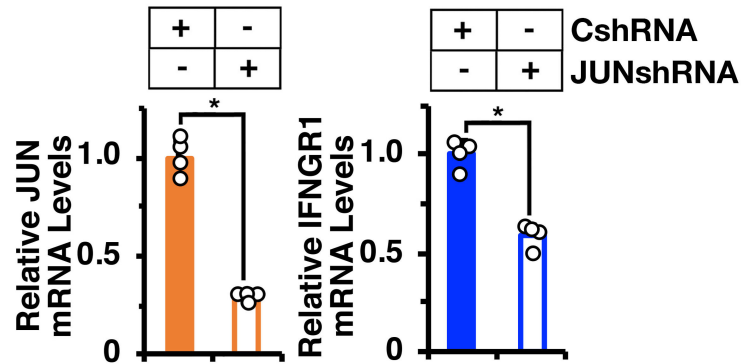

**g. DU-145**

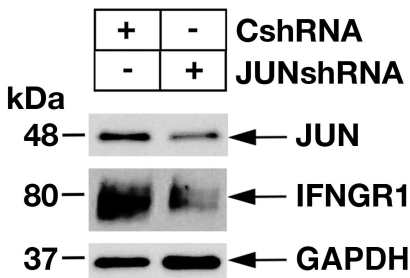

**h. DU-145**

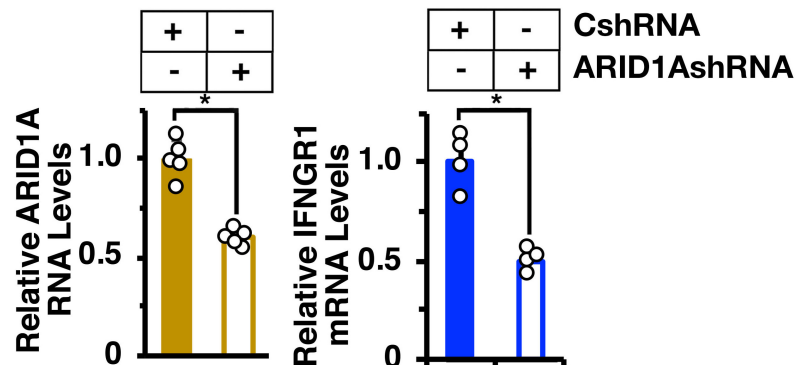

**i.**

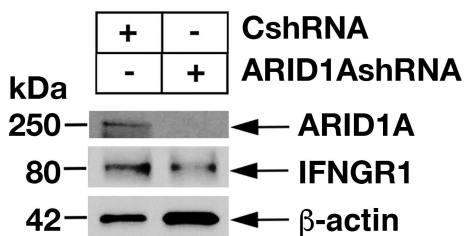

**Supplemental Fig. S1. Silencing MUC1-C and ARID1A suppresses IFNGR1 expression in CRPC/NEPC cells.** (a). LNCaP-AI/tet-MUC1shRNA cells treated with vehicle or DOX for 7 days were analyzed for the indicated mRNA levels by qRT-PCR using primers listed in Supplemental Table S1. The results (mean±SD of 4 determinations) are expressed as relative mRNA levels compared to that obtained for vehicle-treated cells (assigned a value of 1). (b-d). Lysates from LNCaP-AI/tet-MUC1shRNA (b), PC3/tet-MUC1shRNA (c) and NCI-H660/tet-MUC1shRNA (d) cells treated with vehicle or DOX for 7 days were immunoblotted with antibodies against the indicated proteins. (e). Nuclear lysates from DU-145 cells were precipitated with a control IgG or anti-MUC1-C. The input and precipitated proteins were immunoblotted with antibodies against the indicated proteins. (f and g). DU-145 cells expressing a CshRNA or JUNshRNA were analyzed for the indicated mRNA levels by qRT-PCR (f). The results (mean±SD of 4 determinations) are expressed as relative mRNA levels compared to that obtained for CshRNA expressing cells (assigned a value of 1). Lysates were immunoblotted with antibodies against the indicated proteins (g). (h and i). DU-145 cells expressing a CshRNA or ARID1AshRNA were analyzed for the indicated mRNA levels by qRT-PCR (h). The results (mean±SD of 4 determinations) are expressed as relative mRNA levels compared to that obtained for CshRNA expressing cells (assigned a value of 1). Lysates were immunoblotted with antibodies against the indicated proteins (i).

**a. LNCaP-AI/tet-MUC1shRNA**

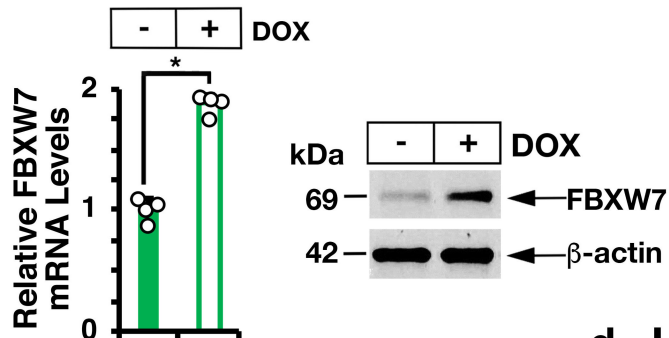

**b. H660/tet-MUC1shRNA**

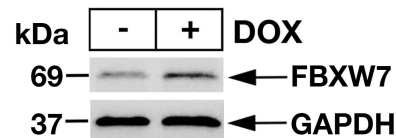

**c. PC3/tet-MUC1shRNA**

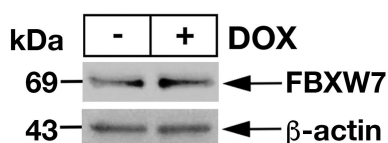

**d. LNCaP/tet-MUC1-C**

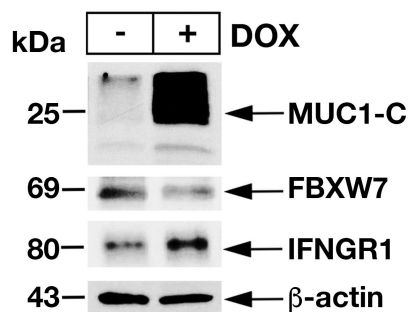

**e. LNCaP-AI/tet-MUC1shRNA**

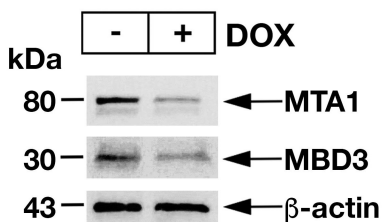

**f.**

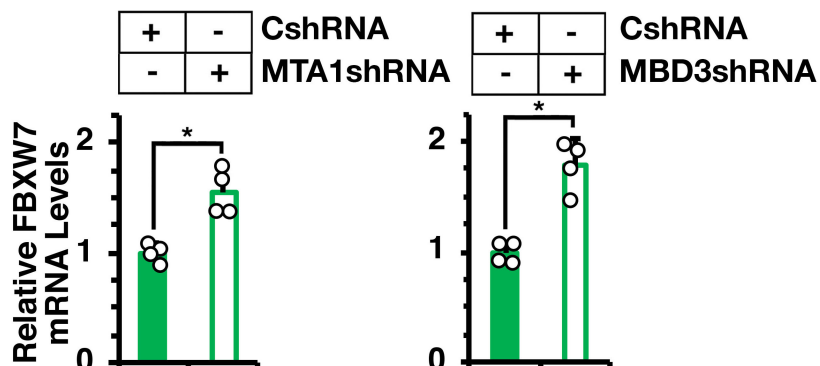

**Supplemental Fig. S2. MUC1-C and NuRD suppress FBXW7 expression in CRPC/NEPC cells.** (a). LNCaP-AI/tet-MUC1shRNA treated with vehicle or DOX for 7 days were analyzed for FBXW7 mRNA levels by qRT-PCR (left). The results (mean±SD of 4 determinations) are expressed as relative mRNA levels compared to that obtained for vehicle-treated cells (assigned a value of 1). Lysates were immunoblotted with antibodies against the indicated proteins (right). (b and c). Lysates from NCI-H660/tet-MUC1shRNA (b) and PC3/tet-MUC1shRNA (c) cells treated with vehicle or DOX for 7 days were immunoblotted with antibodies against the indicated proteins. (d). Lysates from LNCaP/tet-MUC1-C cells treated with vehicle or DOX for 7 days were immunoblotted with antibodies against the indicated proteins. (e). Lysates from LNCaP-AI/tet-MUC1shRNA cells treated with vehicle or DOX for 7 days were immunoblotted with antibodies against the indicated proteins. (f). DU-145 cells expressing a CshRNA, MTA1shRNA (left) or

MBD3shRNA (right) were analyzed for FBXW7 mRNA levels by qRT-PCR. The results (mean $\pm$ SD of 4 determinations) are expressed as relative mRNA levels compared to that obtained for CshRNA expressing cells (assigned a value of 1).

**a. LNCaP-AI/tet-MUC1shRNA**

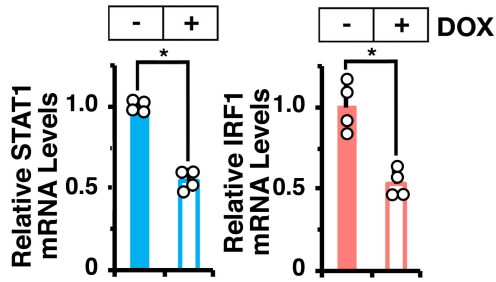

**b. LNCaP-AI/  
tet-MUC1shRNA**

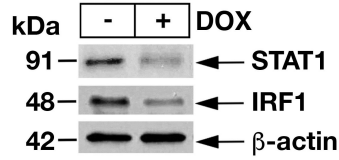

**c. PC3/  
tet-MUC1shRNA**

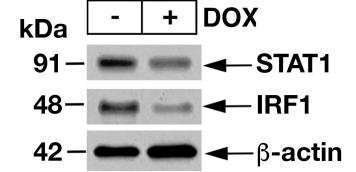

**Supplemental Fig. S3. MUC1-C is necessary for STAT1 and IRF1 expression. (a and b).** LNCaP-AI/tet-MUC1shRNA cells treated with vehicle or DOX for 7 days were analyzed for the indicated mRNA levels by qRT-PCR (a). The results (mean $\pm$ SD of 4 determinations) are expressed as relative mRNA levels compared to that obtained for vehicle-treated cells (assigned a value of 1). Lysates were immunoblotted with antibodies against the indicated proteins (b). (c). Lysates from PC3/tet-MUC1shRNA cells treated with vehicle or DOX for 7 days were immunoblotted with antibodies against the indicated proteins.

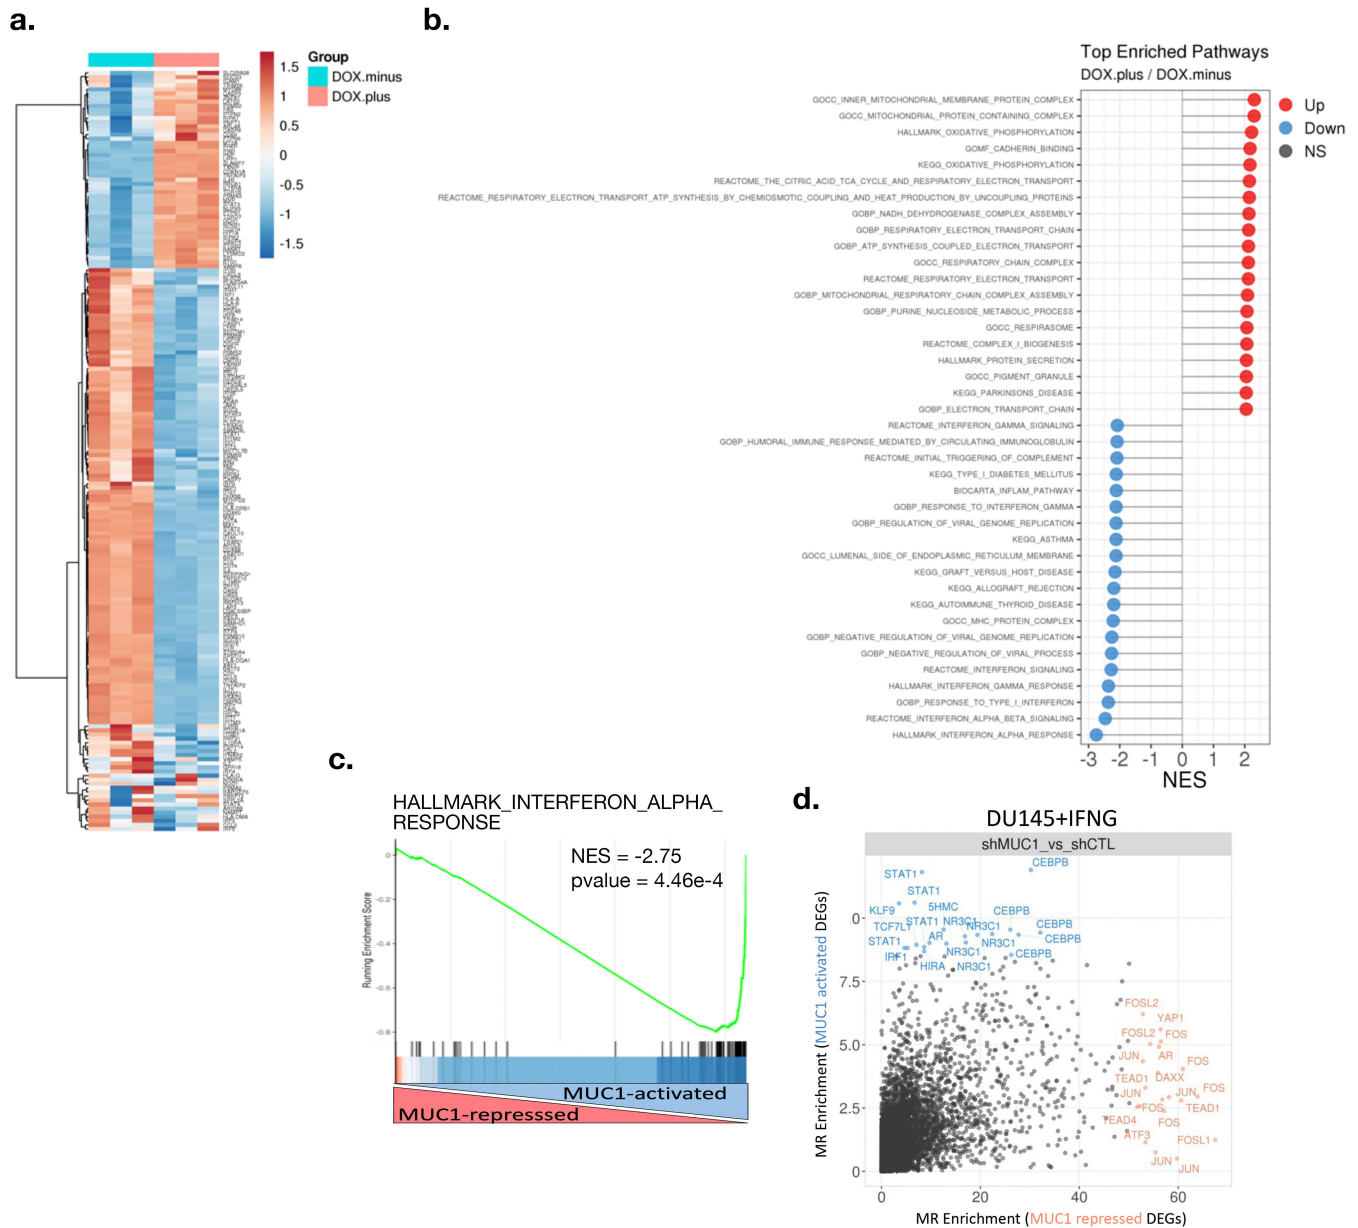

**Supplemental Fig. S4. MUC1-C is necessary for induction of IFN- $\gamma$ -stimulated gene sets.** RNA-seq was performed in triplicates on DU-145/tet-MUC1shRNA cells treated with vehicle or DOX for 7 days and then stimulated with 10 ng/ml IFN- $\gamma$  for 24 hours. **(a).** Heatmap representing all genes from within the HALLMARK INTERFERON GAMMA RESPONSE pathway. Significant DEGs are shown as row annotations (downregulated = teal, upregulated = gold). **(b).** Top 30 significantly enriched pathways activated (top) and suppressed (bottom) by MUC1 silencing. **(c).** Analysis by GSEA using the HALLMARK INTERFERON ALPHA RESPONSE gene signature comparing DOX-treated with vehicle-treated cells. **(d).** Epigenetic Landscape in Silico deletion Analysis (LISA) was applied to the top 500 downregulated (MUC1-induced) and upregulated (MUC1-repressed) DEGs. Each data point represents the

significance level of regulatory potential of a given transcriptional factor derived from a unique ChIP-seq dataset. MUC1-activated genes are enriched for STAT1 and IRF1 in support of MUC1-C integrating the IFN- $\gamma$  response by inducing the STAT1 $\rightarrow$ IRF1 pathway. CEBPB is also enriched in the MUC1-activated gene set.

**a. TCGA-PRAD**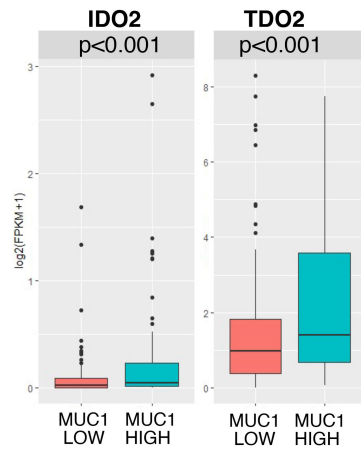**b. SU2C-CRPC**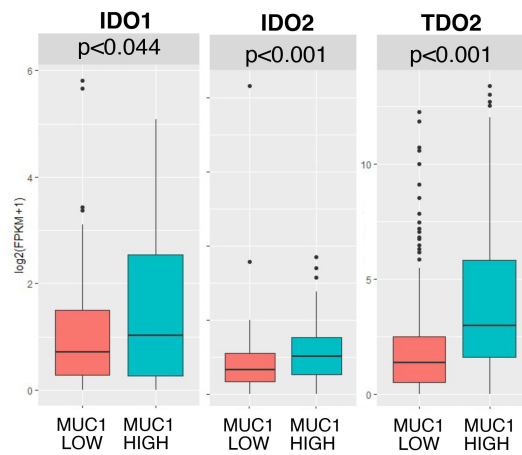**c. SU2C-CRPC**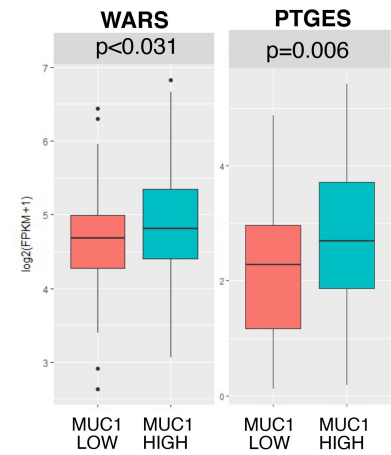

**Supplemental Fig. S5. MUC1-high PCs associate with upregulation of IDO1, IDO2, TDO2, WARS and PTGES. (a-c).** Expression of the indicated genes in the TCGA-PRAD (a) and SU2C-CRPC (b,c) cohorts was assessed in MUC1-high and MUC1-low groups using a Wilcoxon rank-sum test.



**a. LNCaP-AI/tet-MUC1shRNA**

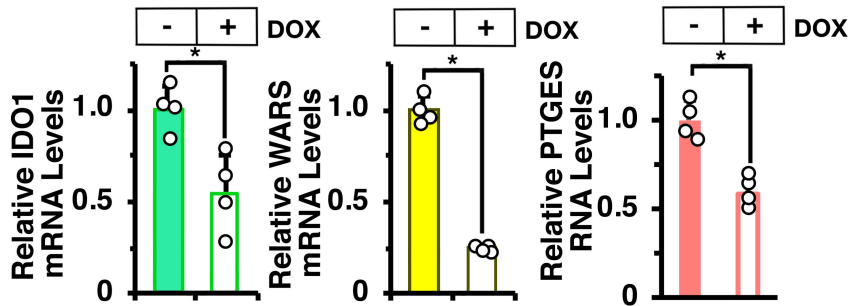

**b. LNCaP-AI/  
tet-MUC1shRNA**

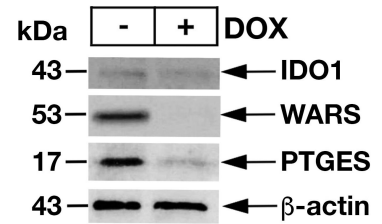

**c. PC3/tet-MUC1shRNA**

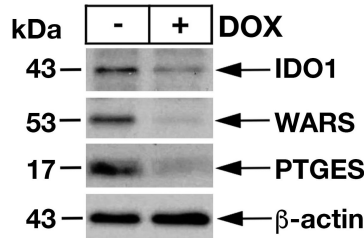

**d. H660/tet-MUC1shRNA**

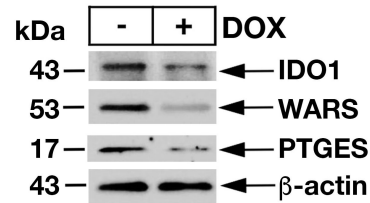

**e. DU-145/tet-MUC1shRNA**

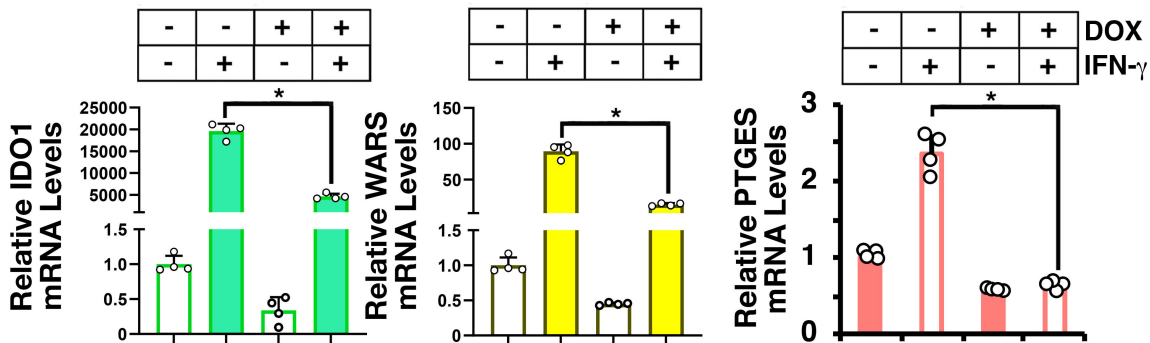

**f. DU-145**

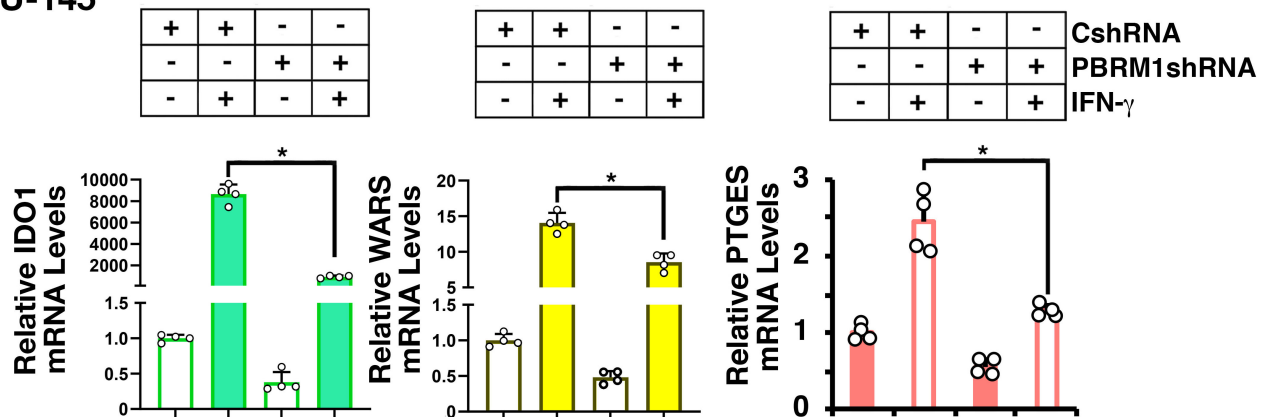

**Supplemental Fig. S6. MUC1-C and PBRM1 are necessary for IDO1, WARS and PTGES expression.** (a and b). LNCaP-AI/tet-MUC1shRNA cells treated with vehicle or DOX for 7 days were analyzed for the indicated mRNA levels by qRT-PCR (a). The results (mean $\pm$ SD of 4 determinations) are expressed as relative mRNA levels compared to that obtained for vehicle-treated cells (assigned a value of 1). Lysates were

immunoblotted with antibodies against the indicated proteins **(b)**. **(c and d)**. Lysates from PC3/tet-MUC1shRNA **(c)** and NCI-H660/tet-MUC1shRNA **(d)** were immunoblotted with antibodies against the indicated proteins. **(e)**. DU-145/tet-MUC1shRNA cells treated with vehicle or DOX for 7 days were stimulated with 10 ng/ml IFN- $\gamma$  for 24 hours. The cells were analyzed for the indicated mRNA levels by qRT-PCR. The results (mean $\pm$ SD of 3 determinations) are expressed as relative mRNA levels compared to that obtained for vehicle-treated cells (assigned a value of 1). **(f)**. DU-145/CshRNA and DU-145/PBRM1shRNA were stimulated with 10 ng/ml IFN- $\gamma$  for 24 hours. Lysates were immunoblotted with antibodies against the indicated protein.

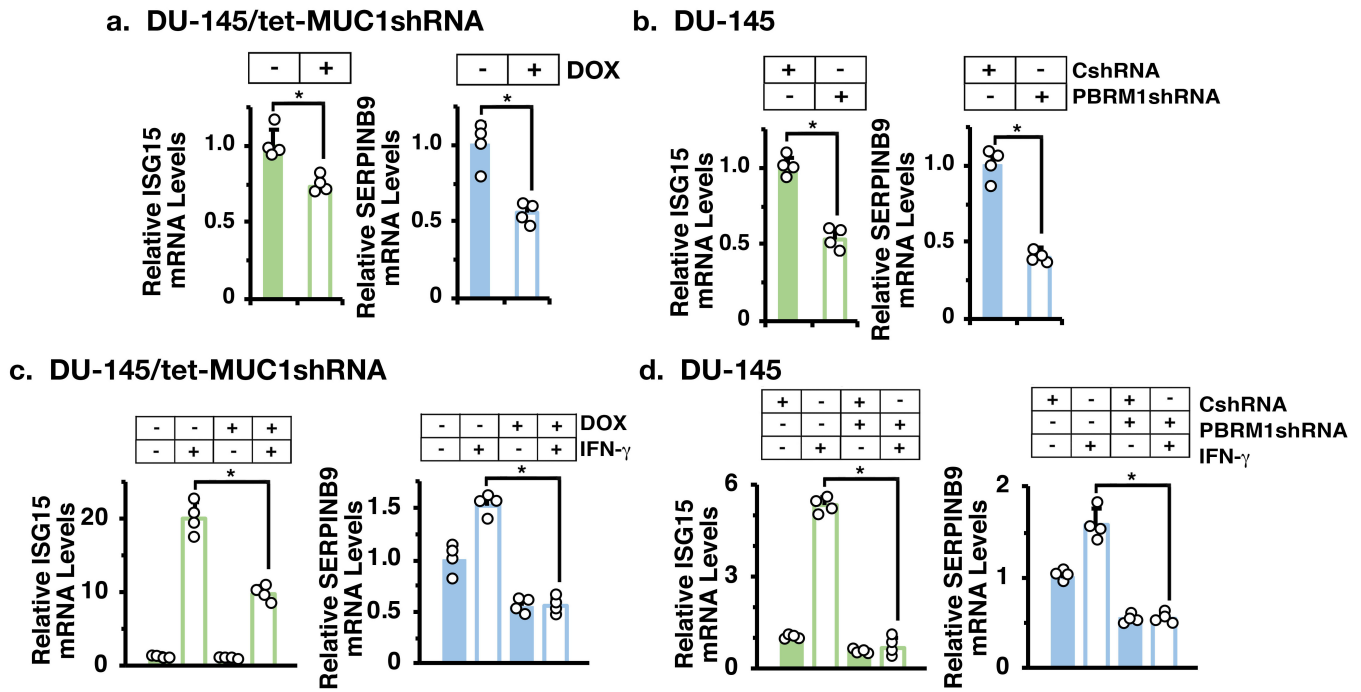

**Supplemental Fig. S7. MUC1 and PBRM1 are necessary for ISG15 and SERPINB9 expression.** (a). DU-145/tet-MUC1shRNA cells treated with vehicle or DOX for 7 days were analyzed for the indicated mRNA levels by qRT-PCR. (b). DU-145/CshRNA and DU-145/PBRM1shRNA cells were analyzed for the indicated mRNA levels by qRT-PCR. (c). DU-145/tet-MUC1shRNA cells treated with vehicle or DOX for 7 days were stimulated with 10 ng/ml IFN- $\gamma$  for 24 hours. The cells were analyzed for the indicated mRNA levels by qRT-PCR. (d). DU-145/CshRNA and DU-145/PBRM1shRNA cells stimulated with 10 ng/ml IFN- $\gamma$  for 24 hours were analyzed for the indicated mRNA levels by qRT-PCR. The results (mean $\pm$ SD of 3 determinations) are expressed as relative mRNA levels compared to that obtained for control cells (assigned a value of 1).

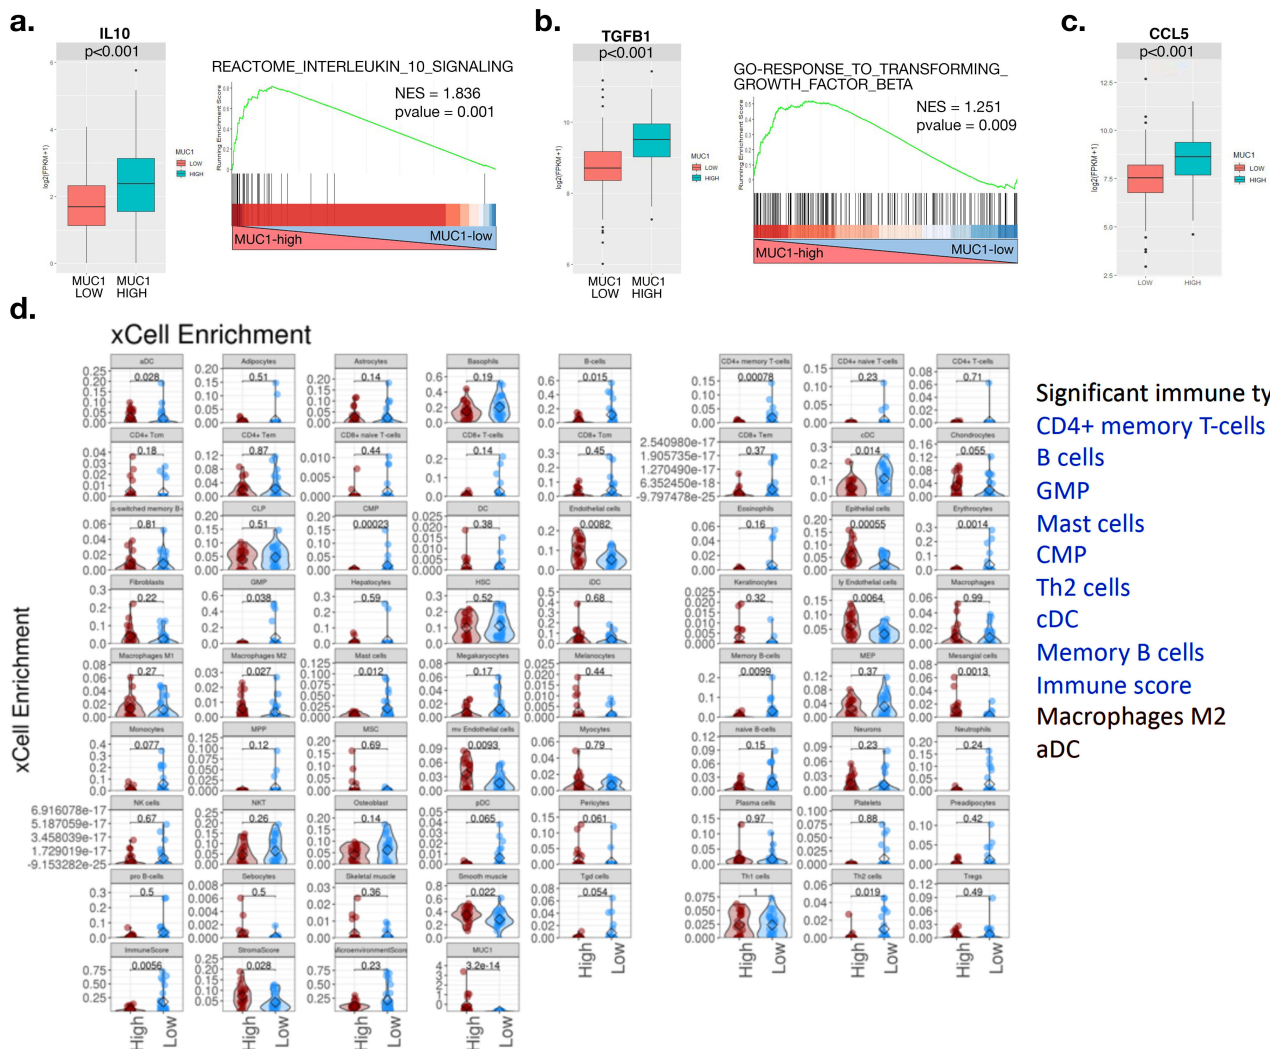

**Supplemental Figure S8. MUC1-high PC tumors associate with (i) increased expression of IL-10, TGFβ1 and CCL5, and (ii) depletion of immune effectors in the TME. (a).** Expression of IL-10 in the TCGA-PRAD cohort was assessed in MUC1-high and MUC1-low groups using the Wilcoxon rank-sum test (left). Enrichment plot for the REACTOME INTERLEUKIN 10 SIGNALING pathway, comparing MUC1-high to MUC1-low PC tumors in the TCGA-PRAD cohort (right). **(b).** Expression of TGFβ1 in the TCGA-PRAD cohort was assessed in MUC1-high and MUC1-low groups using the Wilcoxon rank-sum test (left). Enrichment plot for the GO RESPONSE TO TRANSFORMING GROWTH FACTOR BETA pathway, comparing MUC1-high to MUC1-low PC tumors in the TCGA-PRAD cohort (right). **(c).** Expression of CCL5 in the TCGA-PRAD cohort was assessed in MUC1-high and MUC1-low groups using the Wilcoxon rank-sum test. **(d).** Cell type estimates (xCell) of MUC1-high and MUC1-low CRPC tumors from the Beltran cohort.

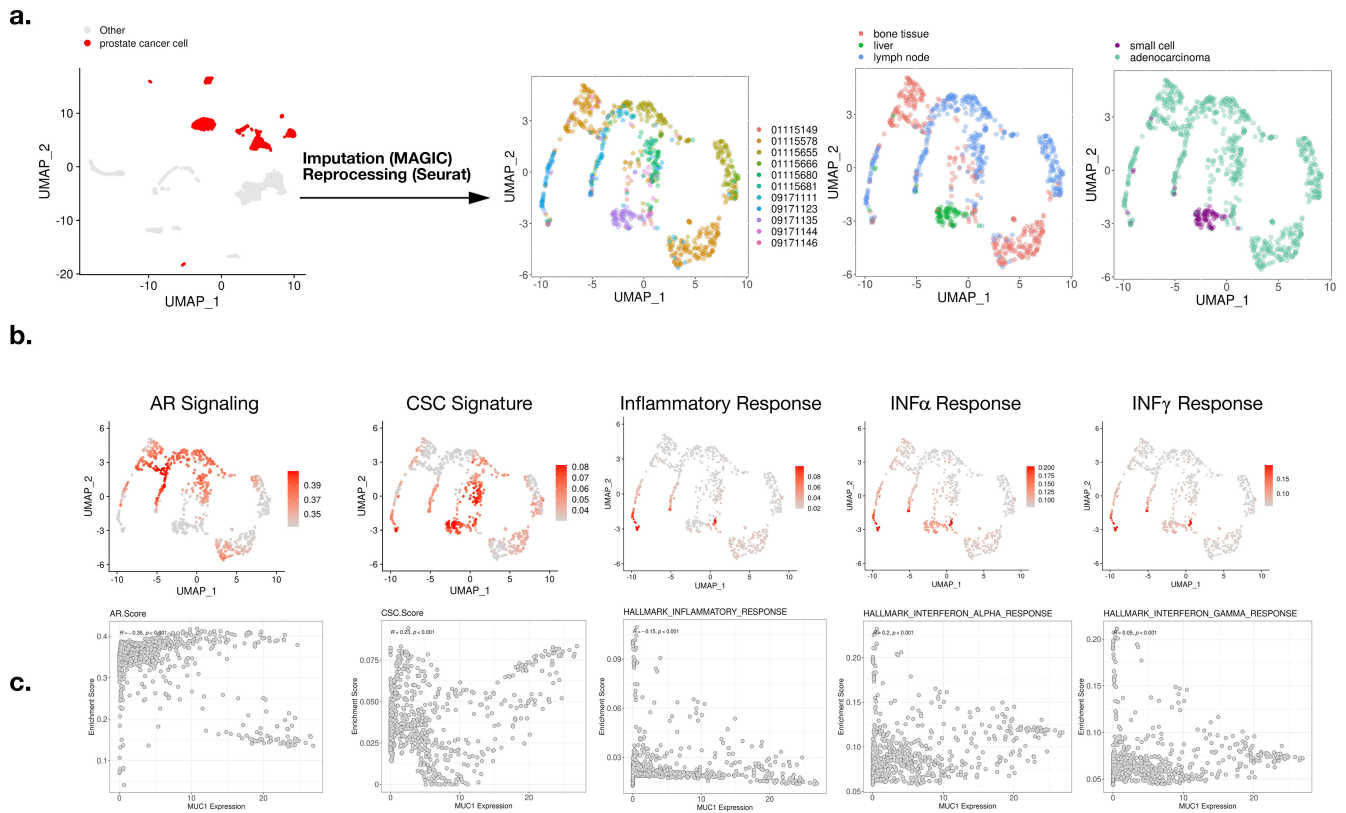

**Supplemental Figure S9. MUC1 associates with CSC and IFN signatures in CRPC cells.** (a). Normalized and annotated scRNA-seq data from CRPC cells were obtained from He et al. CRPC cell expression was imputed using MAGIC and reprocessed for assessment of MUC1 across CRPC transcriptional phenotypes. (b). Single-cell enrichment was performed for curated AR and CSC signatures and select HALLMARK pathways. (c). Correlation analysis of Single-cell enrichment scores with MUC1 expression across CRPC cells.

**Supplemental Table S1. Primers used for qRT-PCR.**

|                 |            |                                 |
|-----------------|------------|---------------------------------|
| <b>MUC1-C</b>   | <b>FWD</b> | TACCGATCGTAGCCCCTATG            |
|                 | <b>REV</b> | CTCACCAGCCCAAACAGG              |
| <b>IFNGR1</b>   | <b>FWD</b> | CTTTGGGTCAGAGTTAAAGCCA          |
|                 | <b>REV</b> | TTCCATCTCGGCATACAGCAA           |
| <b>FBXW7</b>    | <b>FWD</b> | CGAACTCCAGTAGTATTGTGGACCT       |
|                 | <b>REV</b> | TTCTTTTCATTTTTGT TGTTTTTGTATAGA |
| <b>STAT1</b>    | <b>FWD</b> | GGAACTTGATGGCCCTAAAGGA          |
|                 | <b>REV</b> | ACAGAGCCCCTATCCGAGACA           |
| <b>IRF1</b>     | <b>FWD</b> | CATGGCTGGGACATCAACAA            |
|                 | <b>REV</b> | TTGTATCGGCCTGTGTGAATG           |
| <b>JUN</b>      | <b>FWD</b> | CCAAAGGATAGTGCATGTTT            |
|                 | <b>REV</b> | CTGTCCCTCTCCACTGCAAC            |
| <b>ARID1A</b>   | <b>FWD</b> | ACCTCTATCGCCTCTATGTGTCTGT       |
|                 | <b>REV</b> | CTGGCAGCACTGCTTGATGT            |
| <b>IDO1</b>     | <b>FWD</b> | TCTCATTTTCGTGATGGAGACT          |
|                 | <b>REV</b> | GTGTCCCGTTCTTGCATTTGC           |
| <b>WARS</b>     | <b>FWD</b> | TGACGGATGACGAGAAGTATCT          |
|                 | <b>REV</b> | GCCGAAAATGCCTTTCCTTG            |
| <b>PTGES</b>    | <b>FWD</b> | GGAAACTGCAAATGTCCCCTTGAT        |
|                 | <b>REV</b> | CACATCTCAGGTCACGGGTCTA          |
| <b>ISG15</b>    | <b>FWD</b> | CGCAGATCACCCAGAAGATCG           |
|                 | <b>REV</b> | TTCGTCGCATTTGTCCACCA            |
| <b>SERPINB9</b> | <b>FWD</b> | TGGACCAAGCCAGACTGTATG           |
|                 | <b>REV</b> | TGCACGAACTTGGACAGACA            |
| <b>GAPDH</b>    | <b>FWD</b> | CCAAGACCCTGATGAACACC            |
|                 | <b>REV</b> | CCAAGACCCTGATGAACACC            |
